# Supplementary material for: In vivo detection of bile duct pre-cancer with endoscopic light scattering spectroscopy
Source: PubMed Central journal article supplement (PMC9825389; doi:10.1038/s41467-022-35780-7), 2023-01-07
Supplement: 41467_2022_35780_MOESM2_ESM.pdf [file 41467_2022_35780_MOESM2_ESM.pdf]

## **Description of Additional Supplementary Files**

File Name: Supplementary Movie 1

Description: Animation of the in vivo clinical spectroscopic measurements in the bile duct.
